# Supplementary material for: Relocation of Sr48 to Chromosome 2D Using an Alternative Mapping Population and Development of a Closely Linked Marker Using Diverse Molecular Technologies
Source: MDPI journal article supplement (doi:10.3390/plants12081601), 2023-04-10
Supplement: s1 [file s1]

**Supplementary Table S1** Distribution of markers in the different linkage groups of Arina/Cezanne RIL population.

| Chromosome   | Markers per chromosome | Chromosome length (cM) |
|--------------|------------------------|------------------------|
| A genome     |                        |                        |
| 1A.1         | 4                      | 7.4                    |
| 1A.2         | 17                     | 15.8                   |
| 1A.3         | 34                     | 13.1                   |
| 2A           | 493                    | 283.7                  |
| 3A.1         | 49                     | 10.7                   |
| 3A.2         | 302                    | 236.3                  |
| 4A           | 393                    | 188.9                  |
| 5A.1         | 257                    | 140.3                  |
| 5A.2         | 64                     | 57.8                   |
| 6A.1         | 114                    | 58.7                   |
| 6A.2         | 50                     | 63.4                   |
| 6A.3         | 64                     | 67.9                   |
| 7A.1         | 379                    | 166.1                  |
| 7A.2         | 149                    | 119.0                  |
| <b>Total</b> | <b>2369</b>            | <b>1429.0</b>          |
| B Genome     |                        |                        |
| 1B.1         | 513                    | 142.2                  |
| 1B.2         | 86                     | 48.0                   |
| 2B.1         | 83                     | 24.3                   |
| 2B.2         | 703                    | 209.9                  |
| 3B.1         | 424                    | 142.1                  |
| 3B.2         | 58                     | 16.2                   |
| 3B.3         | 57                     | 19.5                   |
| 3B.4         | 2                      | 0.5                    |
| 4B.1         | 55                     | 15.1                   |
| 4B.2         | 200                    | 127.4                  |
| 5B.1         | 65                     | 35.8                   |
| 5B.2         | 74                     | 32.1                   |
| 5B.3         | 195                    | 98.2                   |
| 6B           | 690                    | 222.9                  |
| 7B.1         | 118                    | 70.8                   |
| 7B.2         | 14                     | 11.3                   |
| 7B.3         | 276                    | 82.3                   |
| <b>Total</b> | <b>3613</b>            | <b>1298.6</b>          |
| D Genome     |                        |                        |
| 1D.1         | 17                     | 7.9                    |
| 1D.2         | 42                     | 27.8                   |

|                               |             |               |
|-------------------------------|-------------|---------------|
| 1D.3                          | 46          | 75.7          |
| 1D.4                          | 8           | 12.0          |
| 2D.1                          | 239         | 134.2         |
| 2D.2                          | 66          | 63.6          |
| 3D.1                          | 77          | 21.3          |
| 3D.2                          | 35          | 23.0          |
| 3D.3                          | 18          | 28.9          |
| 3D.4                          | 39          | 36.2          |
| 4D.1                          | 4           | 1.1           |
| 4D.2                          | 36          | 80.2          |
| 5D.1                          | 66          | 39.1          |
| 5D.2                          | 13          | 20.4          |
| 5D.3                          | 28          | 54.7          |
| 5D.4                          | 69          | 31.3          |
| 6D.1                          | 7           | 7.5           |
| 6D.2                          | 59          | 64.2          |
| 6D.3                          | 81          | 26.3          |
| 6D.4                          | 3           | 4.1           |
| 7D.1                          | 71          | 33.5          |
| 7D.2                          | 93          | 97.2          |
| 7D.3                          | 16          | 35.6          |
| <b>Total</b>                  | <b>1133</b> | <b>925.9</b>  |
| <b>Total of A+B+ D Genome</b> | <b>7115</b> | <b>3653.5</b> |
